# Supplementary material
Source: PubMed Central journal article supplement (PMC4242448)
Supplement: supp_M052407_jlr_M052407-supplT01-T03.pdf [file supp_M052407_jlr_M052407-supplT01-T03.pdf]

**Supplemental Table I: Primer sequences.**

| <b>Name</b>    | <b>Forward</b>                  | <b>Reverse</b>            |
|----------------|---------------------------------|---------------------------|
| <i>Abca1</i>   | CCCAGAGCAAAAAGCGACTC            | GGTCATCATCACTTTGGTCCTTG   |
| <i>Abcg5</i>   | TCAGGACCCCAAGGTCATGAT           | AGGCTGGTGGATGGTGACAAT     |
| <i>Abcg8</i>   | GACAGCTTCACAGCCCACAA            | GCCTGAAGATGTCAGAGCGA      |
| <i>Acacb</i>   | CATACACAGAGCTGGTGTGGACT         | CACCATGCCCACCTCGTTAC      |
| <i>Acox1</i>   | GCCACGGAACTCATCTTCGA            | CCAGGCCACCACTTAATGGA      |
| <i>Apoa4</i>   | GCCAATGTGGTGTGGGATTAC           | TCCTGGAAGAGGGTACTGAGCT    |
| <i>Apob</i>    | GCCCATTGTGGACAAGTTGATC          | CCAGGACTTGGAGGTCTTGGA     |
| <i>Cd36</i>    | GATCGGAACTGTGGGCTCAT            | GGTTCCTTCTTCAAGGACAACTTC  |
| <i>Cd68</i>    | TGACCTGCTCTCTTAAGGCTACA         | TCACGGTTGCAAGAGAAACATG    |
| <i>Cpt1a</i>   | CTCAGTGGGAGCGACTCTTCA           | GGCCTCTGTGGTACACGACAA     |
| <i>Dgat2</i>   | GGGTCCAGAAGAAGTTCCAGAAG         | CCCAGGTGTCAGAGGAGAAGAG    |
| <i>Icam</i>    | CTACCATCACCGTGTATTCGTTTC        | CGGTGCTCCACCATCCA         |
| <i>Il-1b</i>   | AAAGAATCTATACCTGTCCTGTGTAATGAAA | GGTATTGCTTGGGATCCACACT    |
| <i>Lipc</i>    | ACTGCAGGAGTGTGGCTTCAAC          | TGGGACTGTCGGGACTTCAG      |
| <i>Lpl</i>     | AAGGTCAGAGCCAAGAGAAGCA          | CCAGAAAAGTGAATCTTGACTTGGT |
| <i>Mcp1</i>    | GCTGGAGAGCTACAAGAGGATCA         | ACAGACCTCTCTTGTGAGCTTGGT  |
| <i>Mttp</i>    | CAAGCTCACGTA CTCCACTGAAG        | TCATCATCACCATCAGGATTCT    |
| <i>Ppara</i>   | TATTCGGCTGAAGCTGGTGTAC          | CTGGCATTGTGTTCCGGTTCT     |
| <i>Slc27a4</i> | CCAGACAAGGGTTTTACAGATAAGCT      | ACCTGCTGTGCACCACAATG      |
| <i>Srebf1</i>  | GAGGCGGCTCTGGAACAGA             | TGTCTTCGATGTCGTTCAAACC    |
| <i>Tnfa</i>    | CATCTTCTCAA AATTCGAGTGACAA      | TGGGAGTAGACAAGGTACAACCC   |

**Supplemental Table II: Fatty acid composition in the diets**

|                                        | HFD <sup>1</sup> | PSE <sup>2</sup> | PSA <sup>3</sup> |
|----------------------------------------|------------------|------------------|------------------|
| <i>Fatty Acid Composition</i>          |                  |                  |                  |
| <i>C8-C12:0 (g/kg)</i>                 | 0.68             | 0.61             | 0.61             |
| <i>C14:0 (g/kg)</i>                    | 5.53             | 5.38             | 5.38             |
| <i>C16:0 (g/kg)</i>                    | 46.70            | 44.49            | 44.49            |
| <i>C16:1 (g/kg)</i>                    | 5.60             | 5.38             | 5.38             |
| <i>C18:0 (g/kg)</i>                    | 34.63            | 33.62            | 33.62            |
| <i>C18:1 (g/kg)</i>                    | 84.86            | 76.63            | 76.63            |
| <i>C18:2 (g/kg)</i>                    | 20.47            | 18.19            | 18.16            |
| <i>C18:3 (g/kg)</i>                    | 4.21             | 2.96             | 2.96             |
| <i>C20-C22 (g/kg)</i>                  | 1.95             | 1.87             | 1.87             |
| <i>Total Caloric Content (kcal/kg)</i> | 4719.69          | 4519.40          | 4519.40          |

<sup>1</sup>HFD: high fat diet; <sup>2</sup>PSE: high fat diet supplemented with plant sterol esters; <sup>3</sup>PSA: high fat diet supplemented with plant stanol esters.

**Supplemental Table III: Calorie intake**

|                                  | HFD <sup>1</sup> | PSE <sup>2</sup> | PSA <sup>3</sup> |
|----------------------------------|------------------|------------------|------------------|
| <i>Calorie intake (kcal/day)</i> | 16.8 ± 2.1       | 23.4 ± 1.6       | 26.7 ± 1.3       |

<sup>1</sup>HFD: high fat diet; <sup>2</sup>PSE: high fat diet supplemented with plant sterol esters; <sup>3</sup>PSA: high fat diet supplemented with plant stanol esters.
